# Supplementary material for: Evaluation of the Interaction between Long Telomeric DNA and Macrocyclic Hexaoxazole (6OTD) Dimer of a G-quadruplex Ligand
Source: MDPI journal article supplement (doi:10.3390/molecules18044328), 2013-04-12

# Supplementary Materials

Figure S1. Copies of NMR spectra of compounds (3–7).

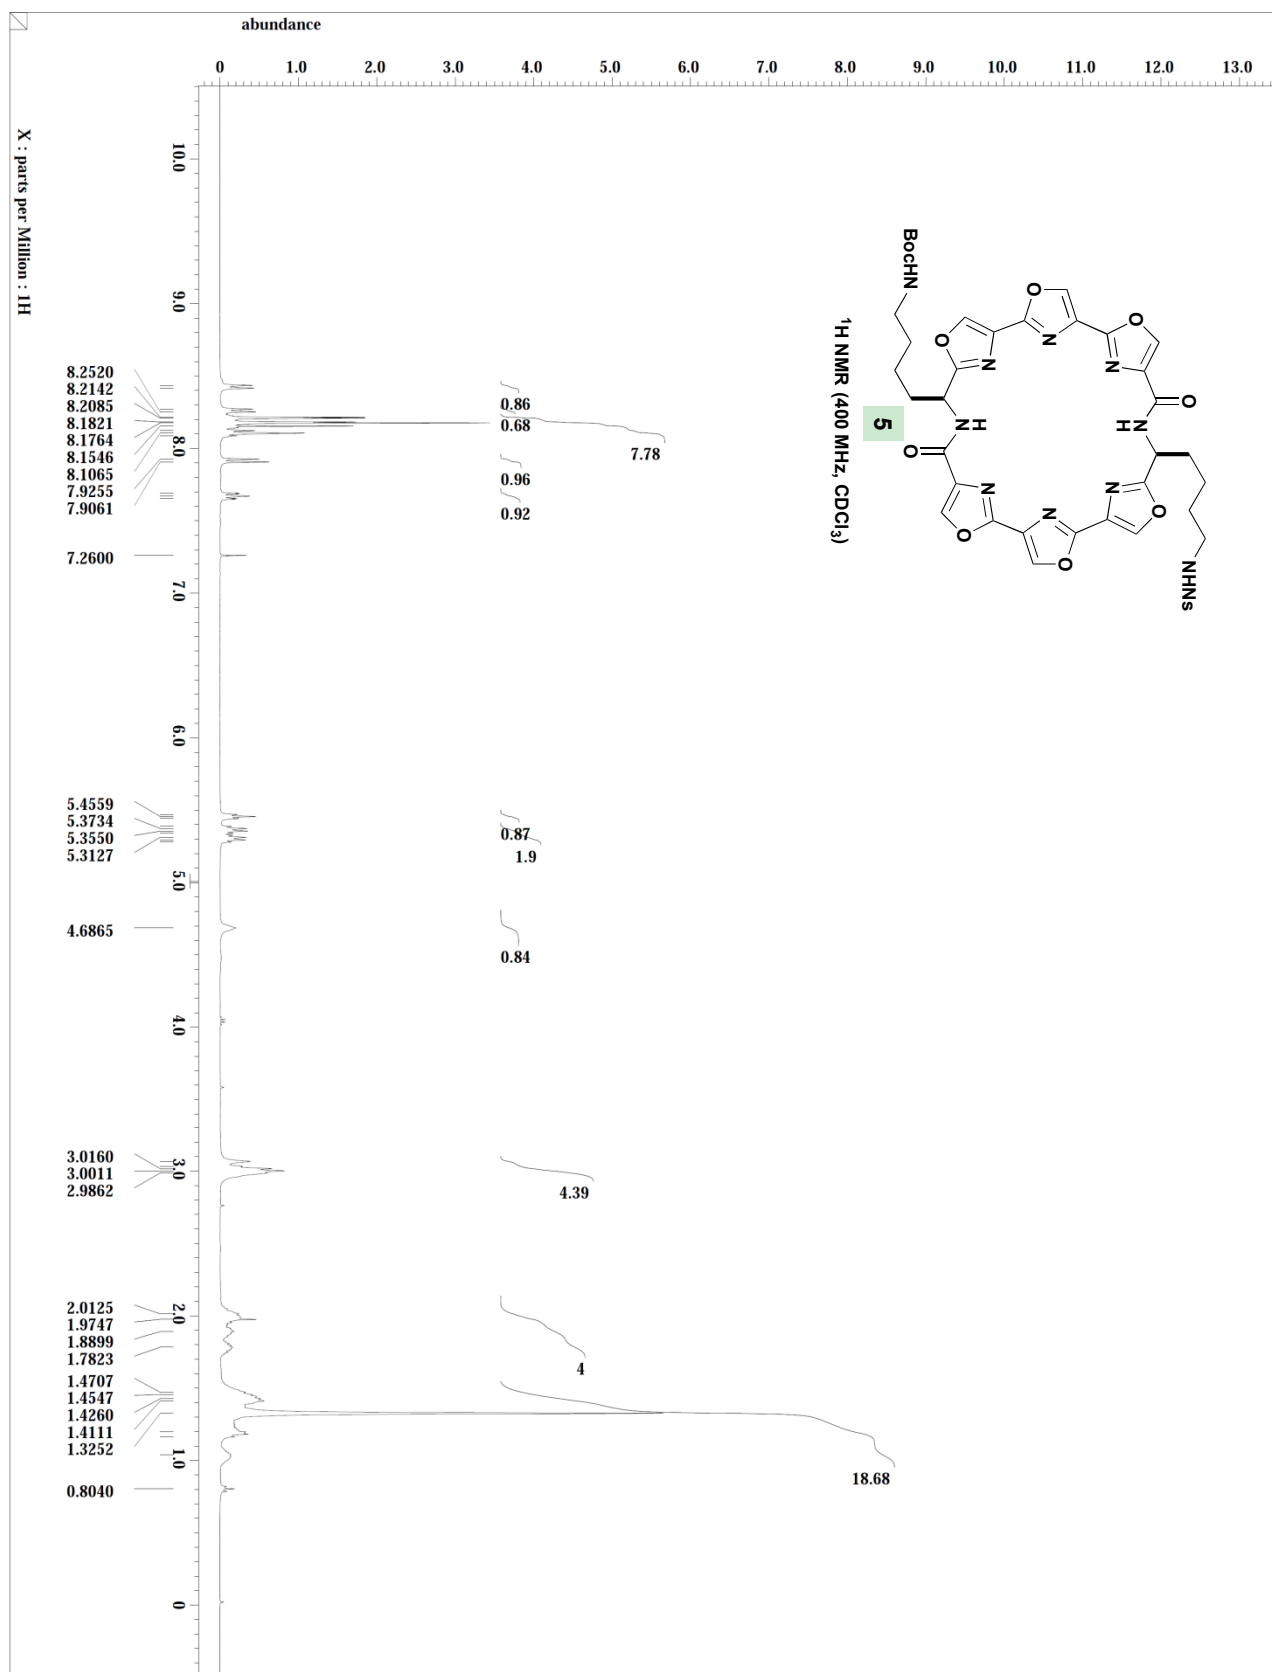

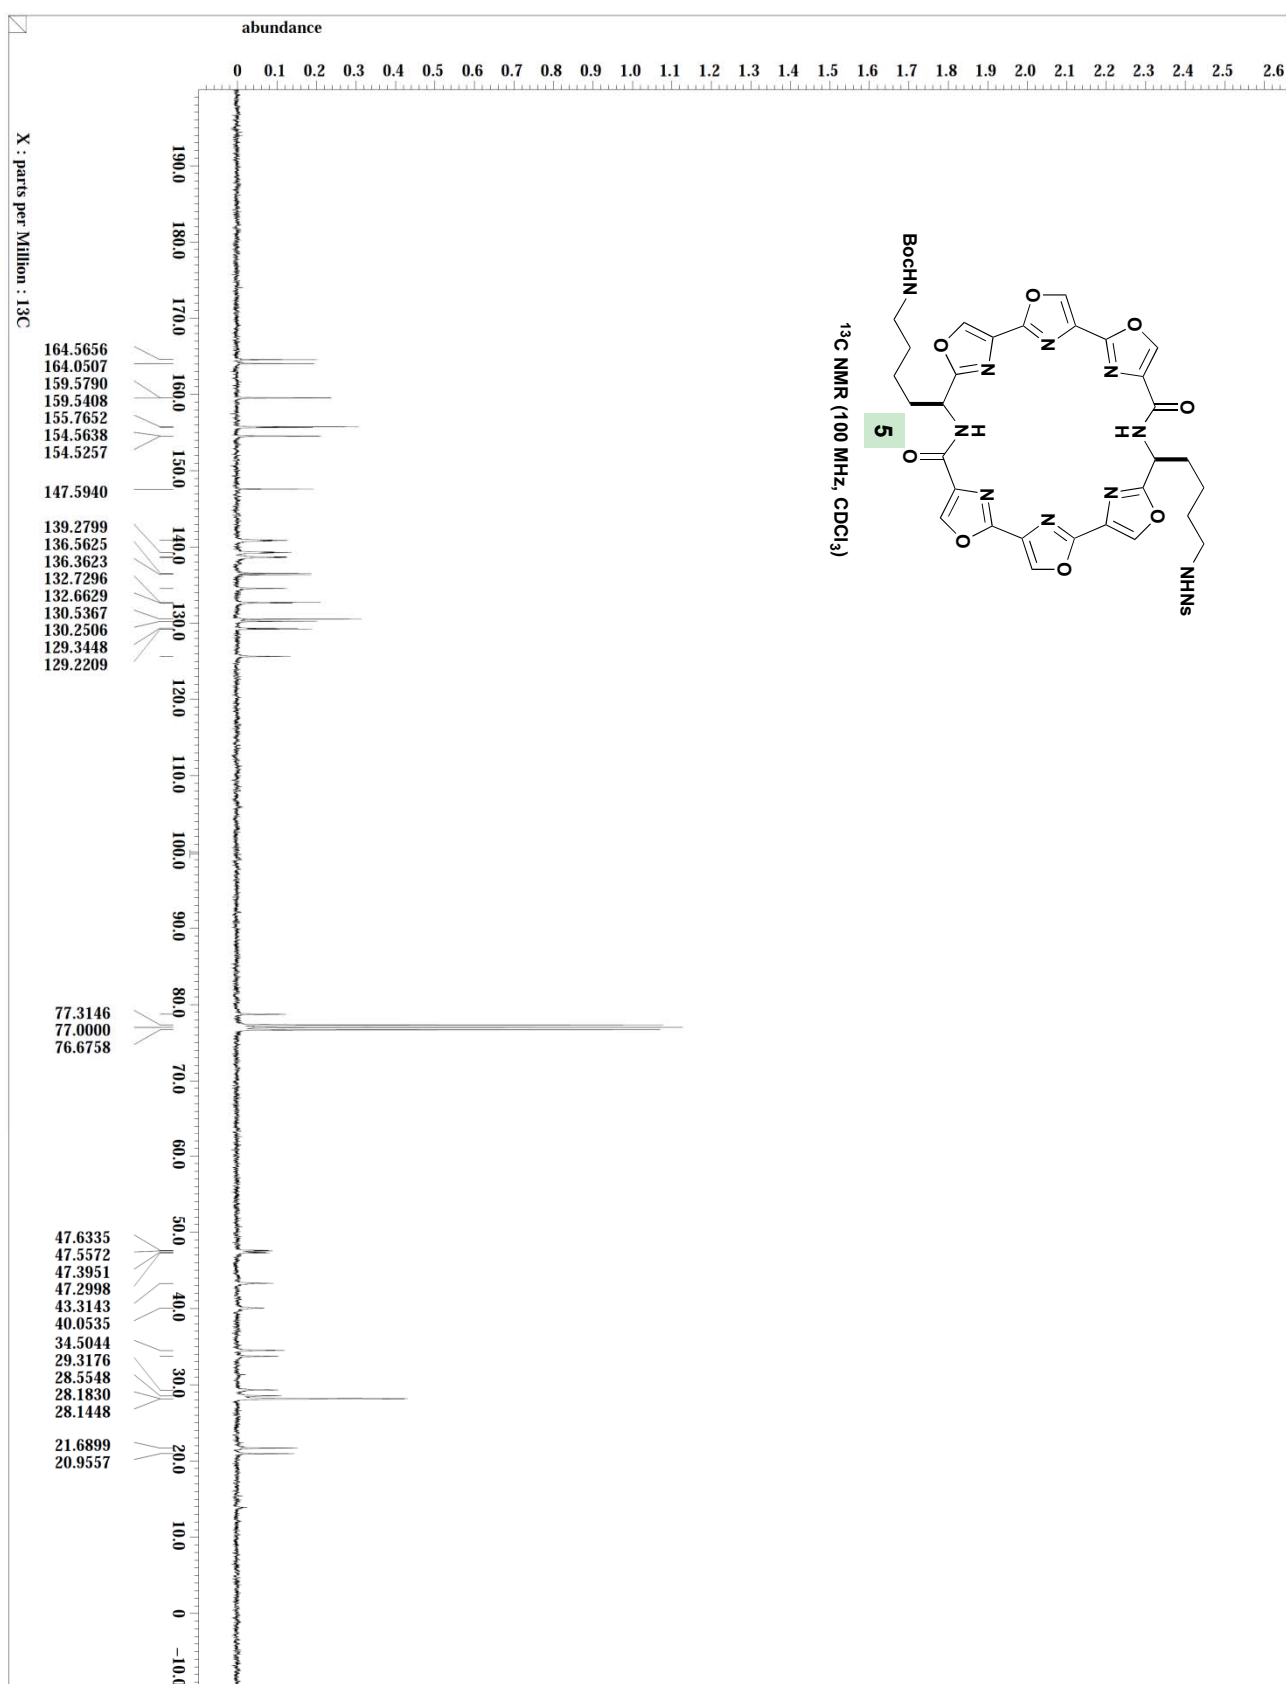

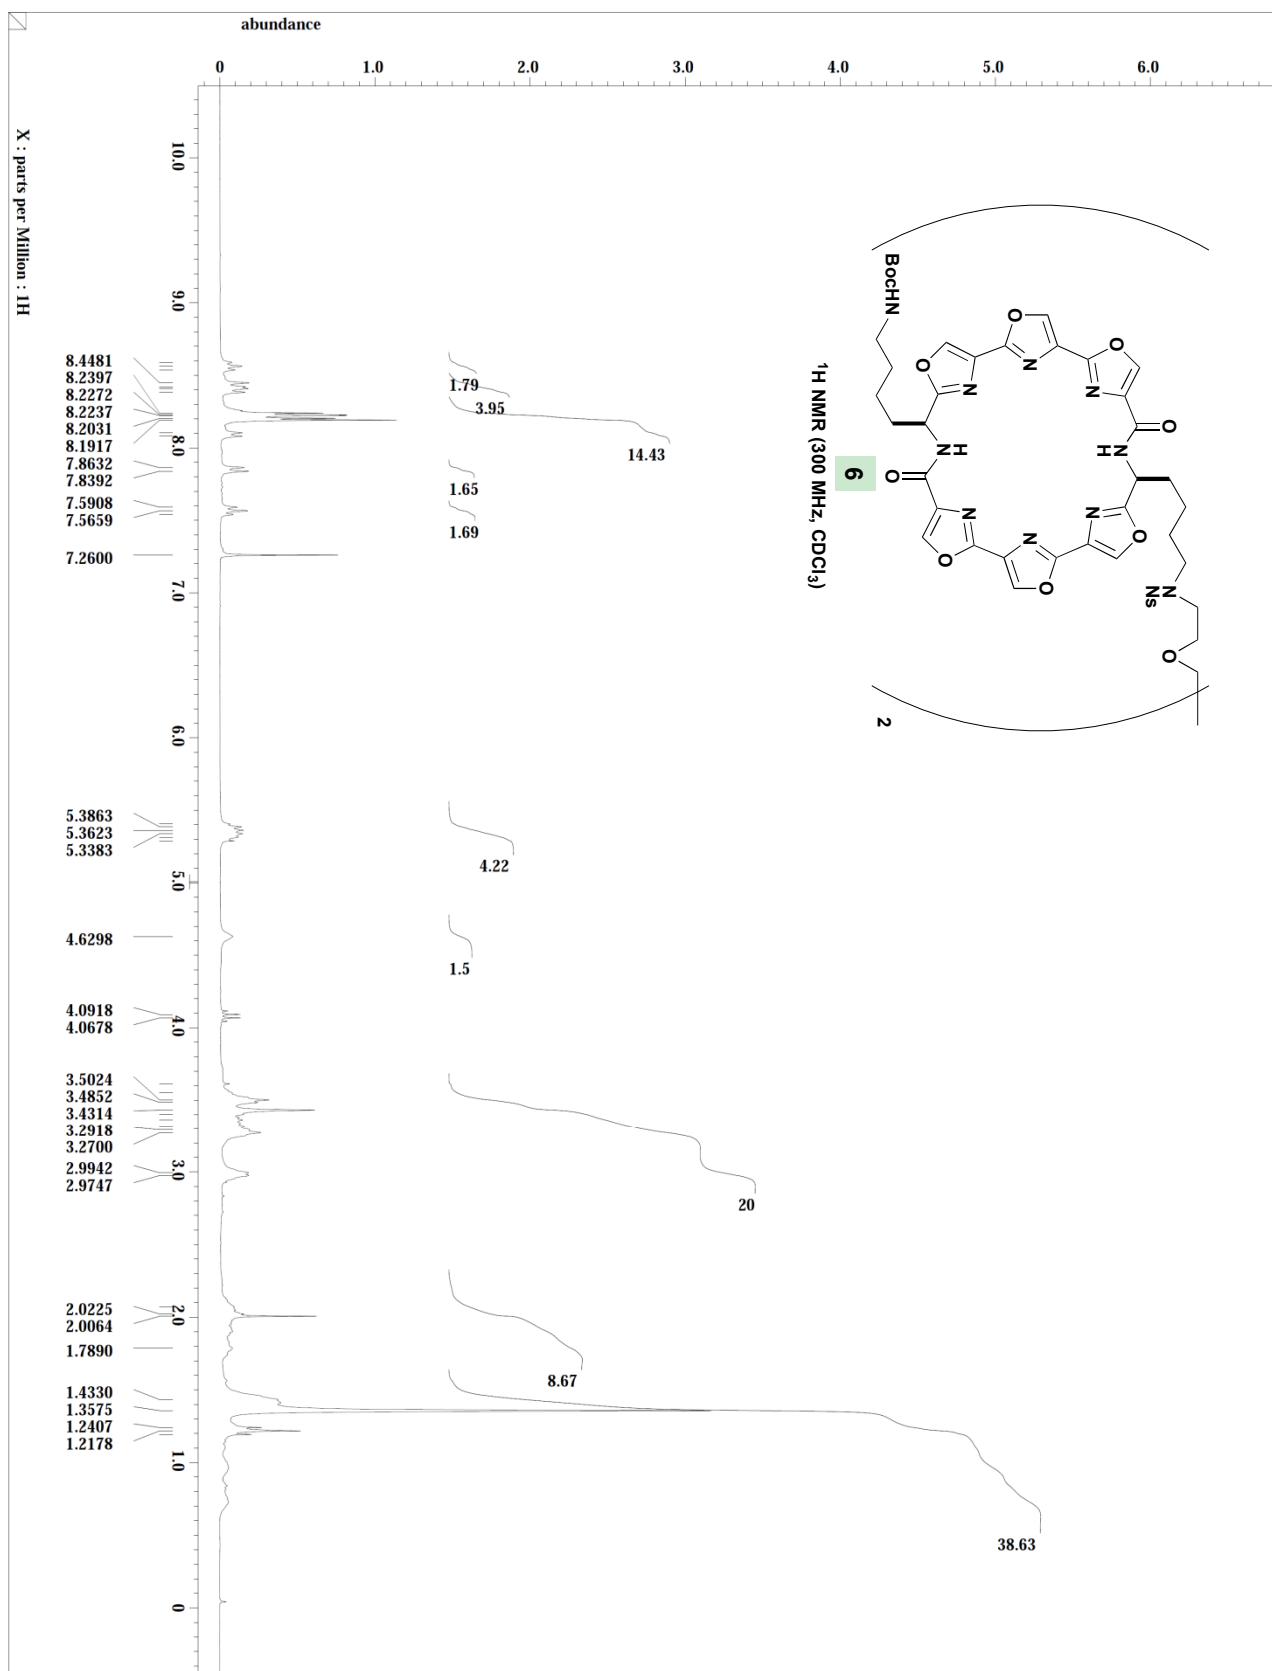

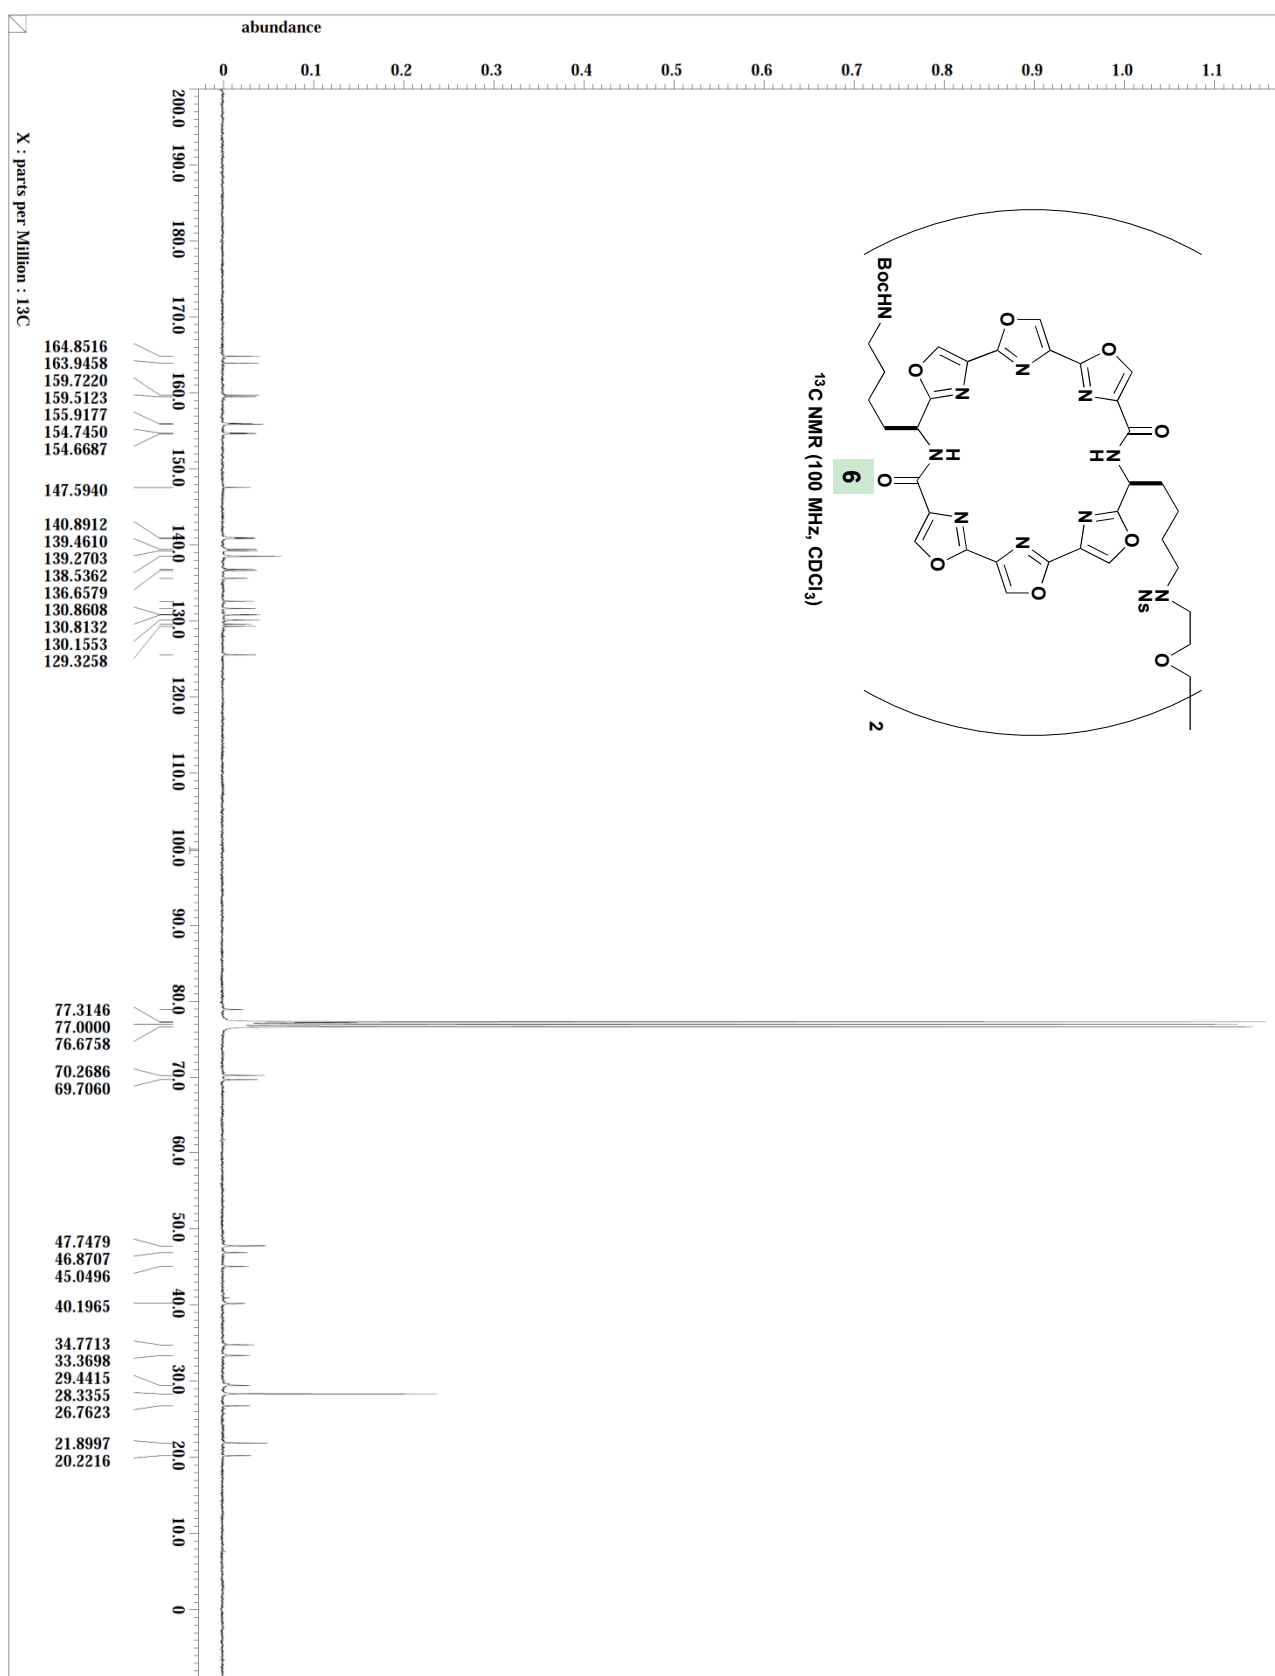

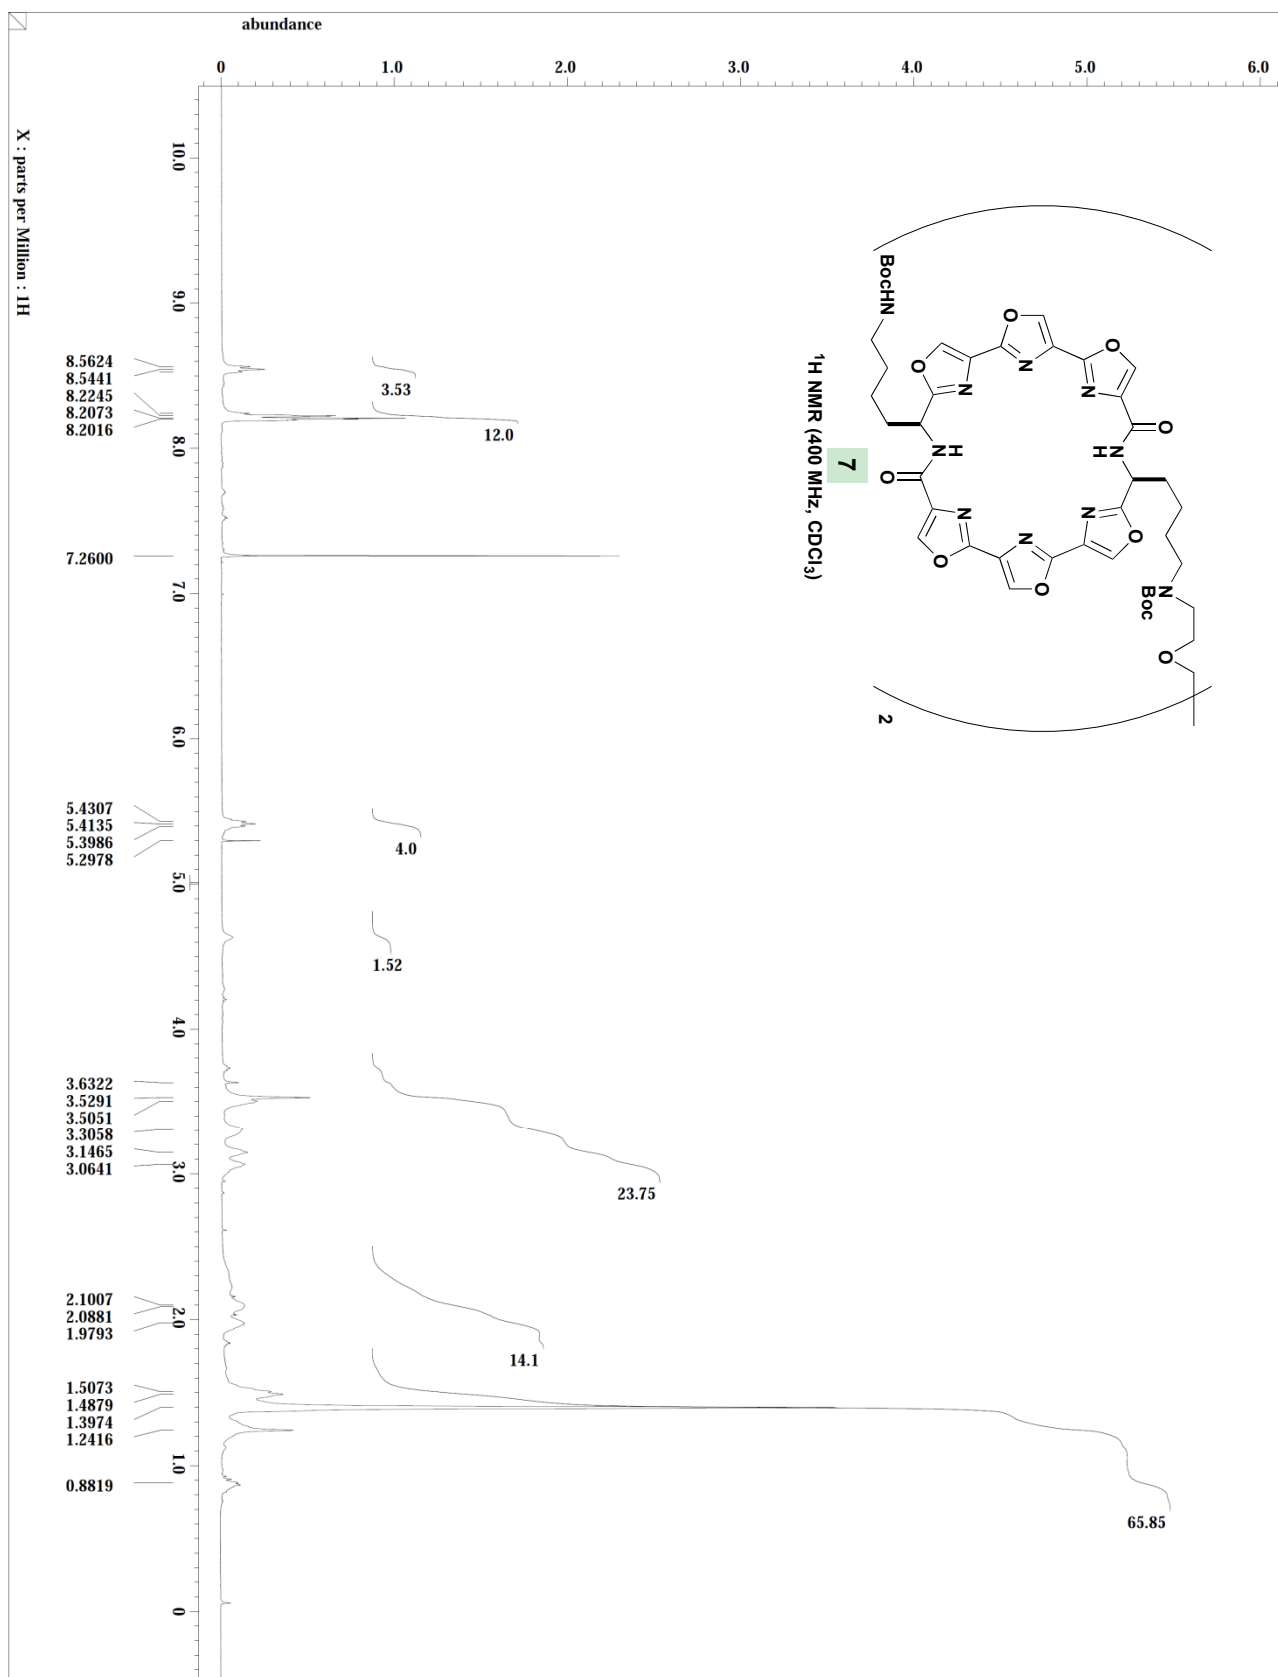

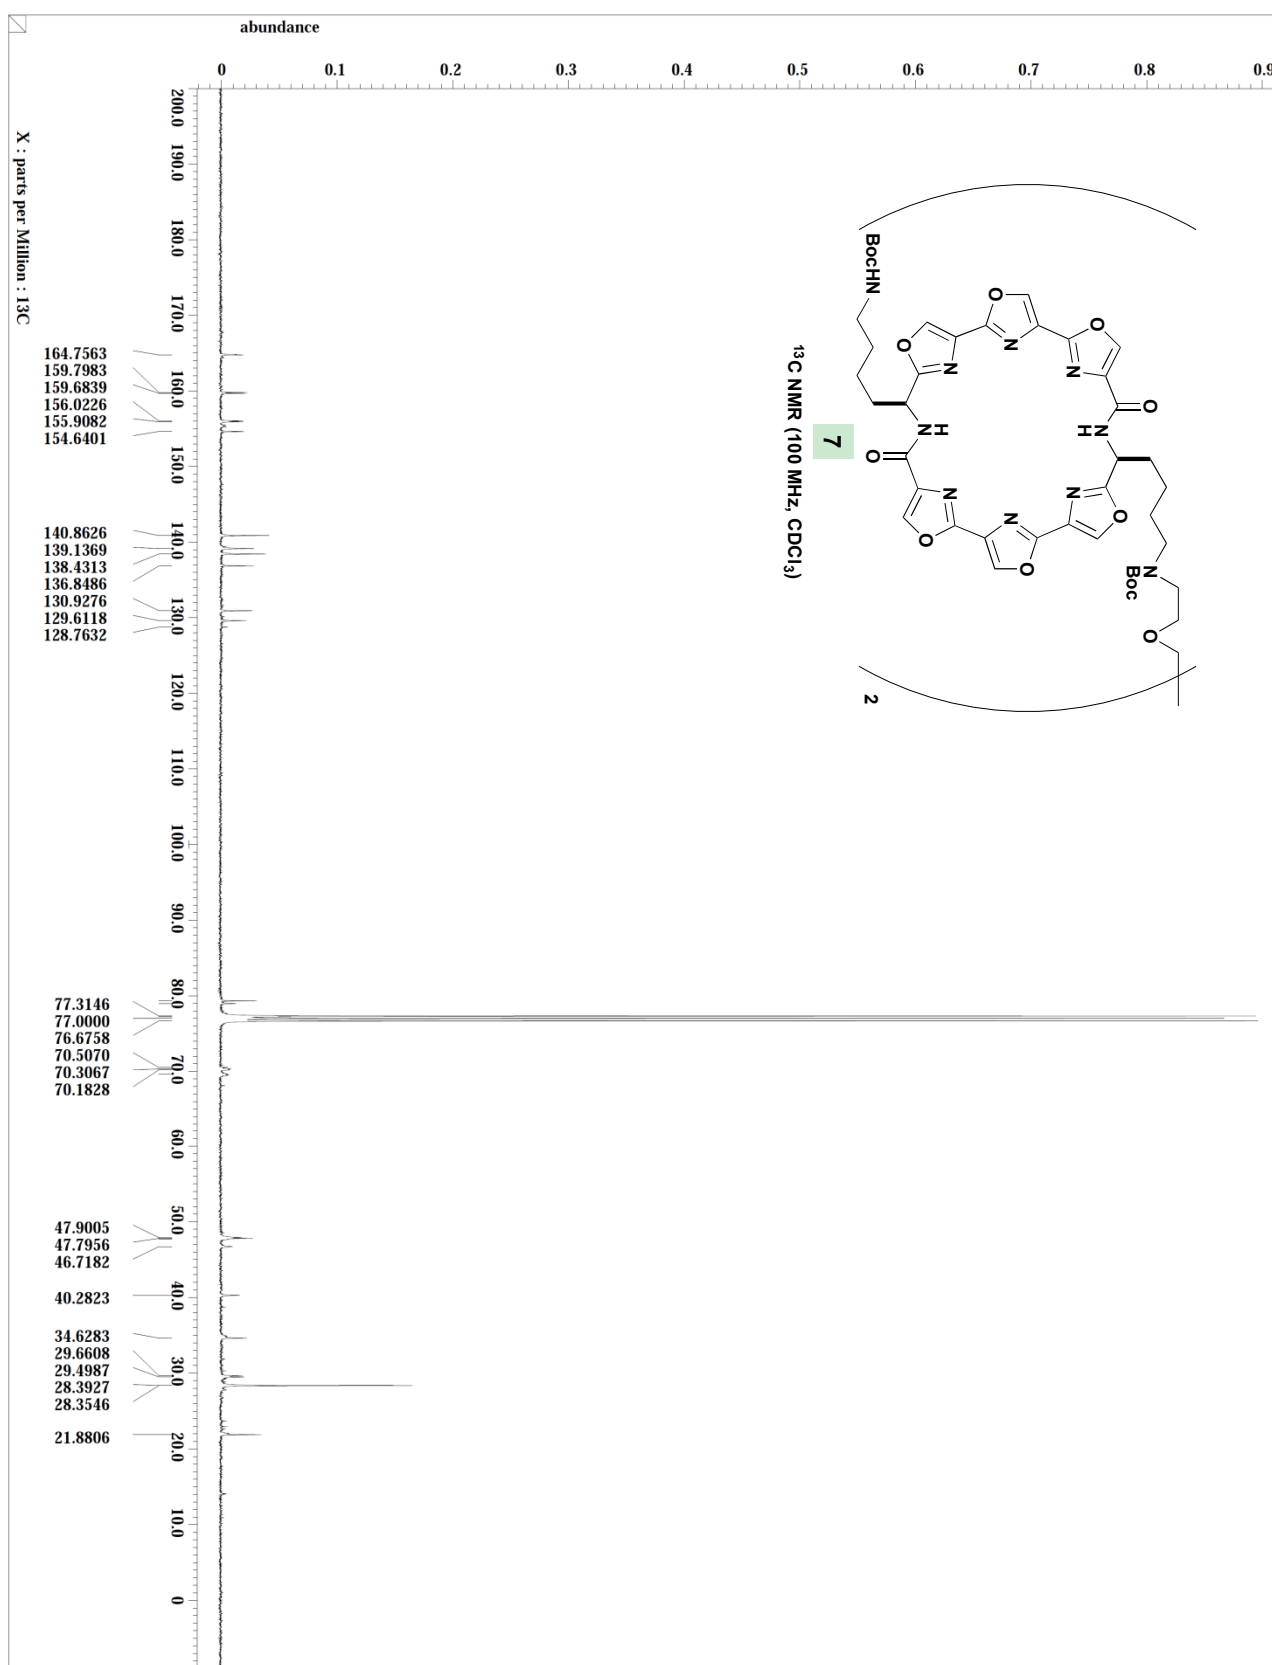

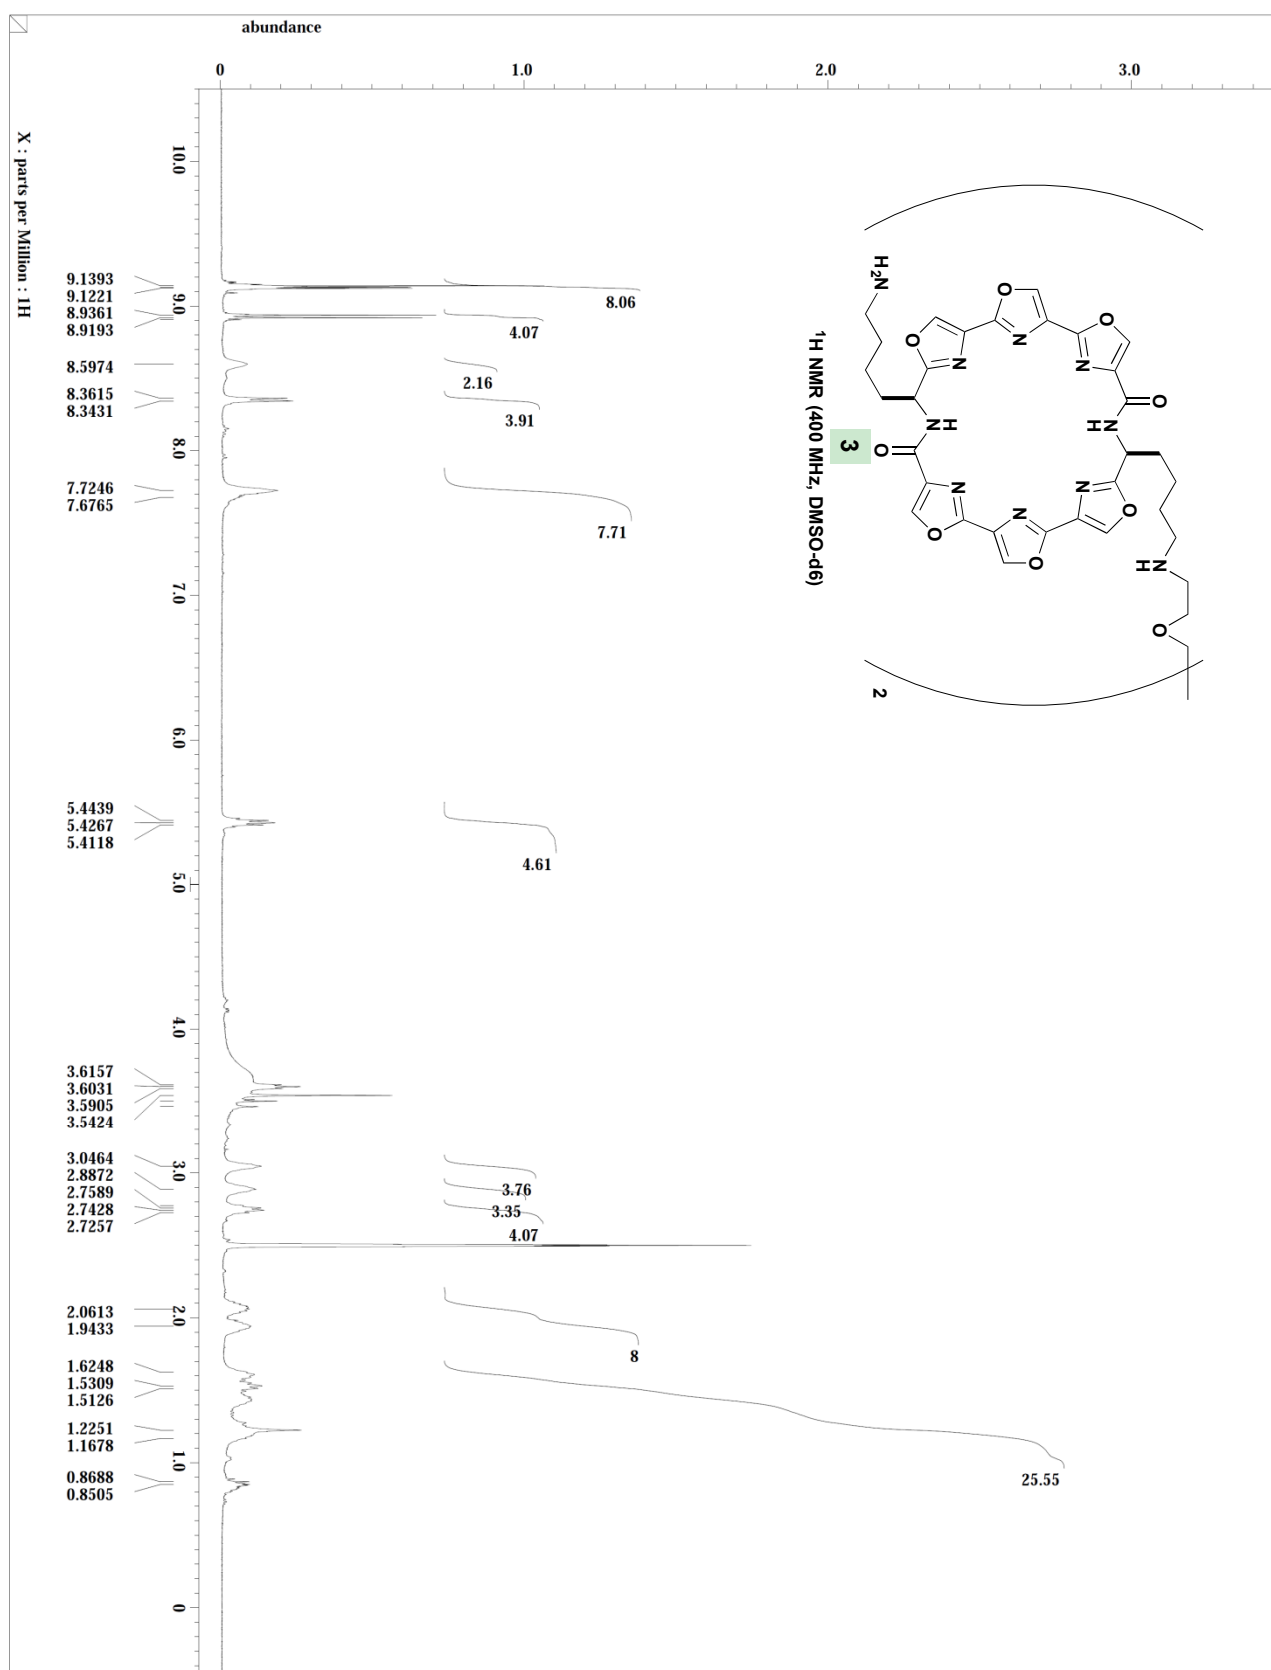

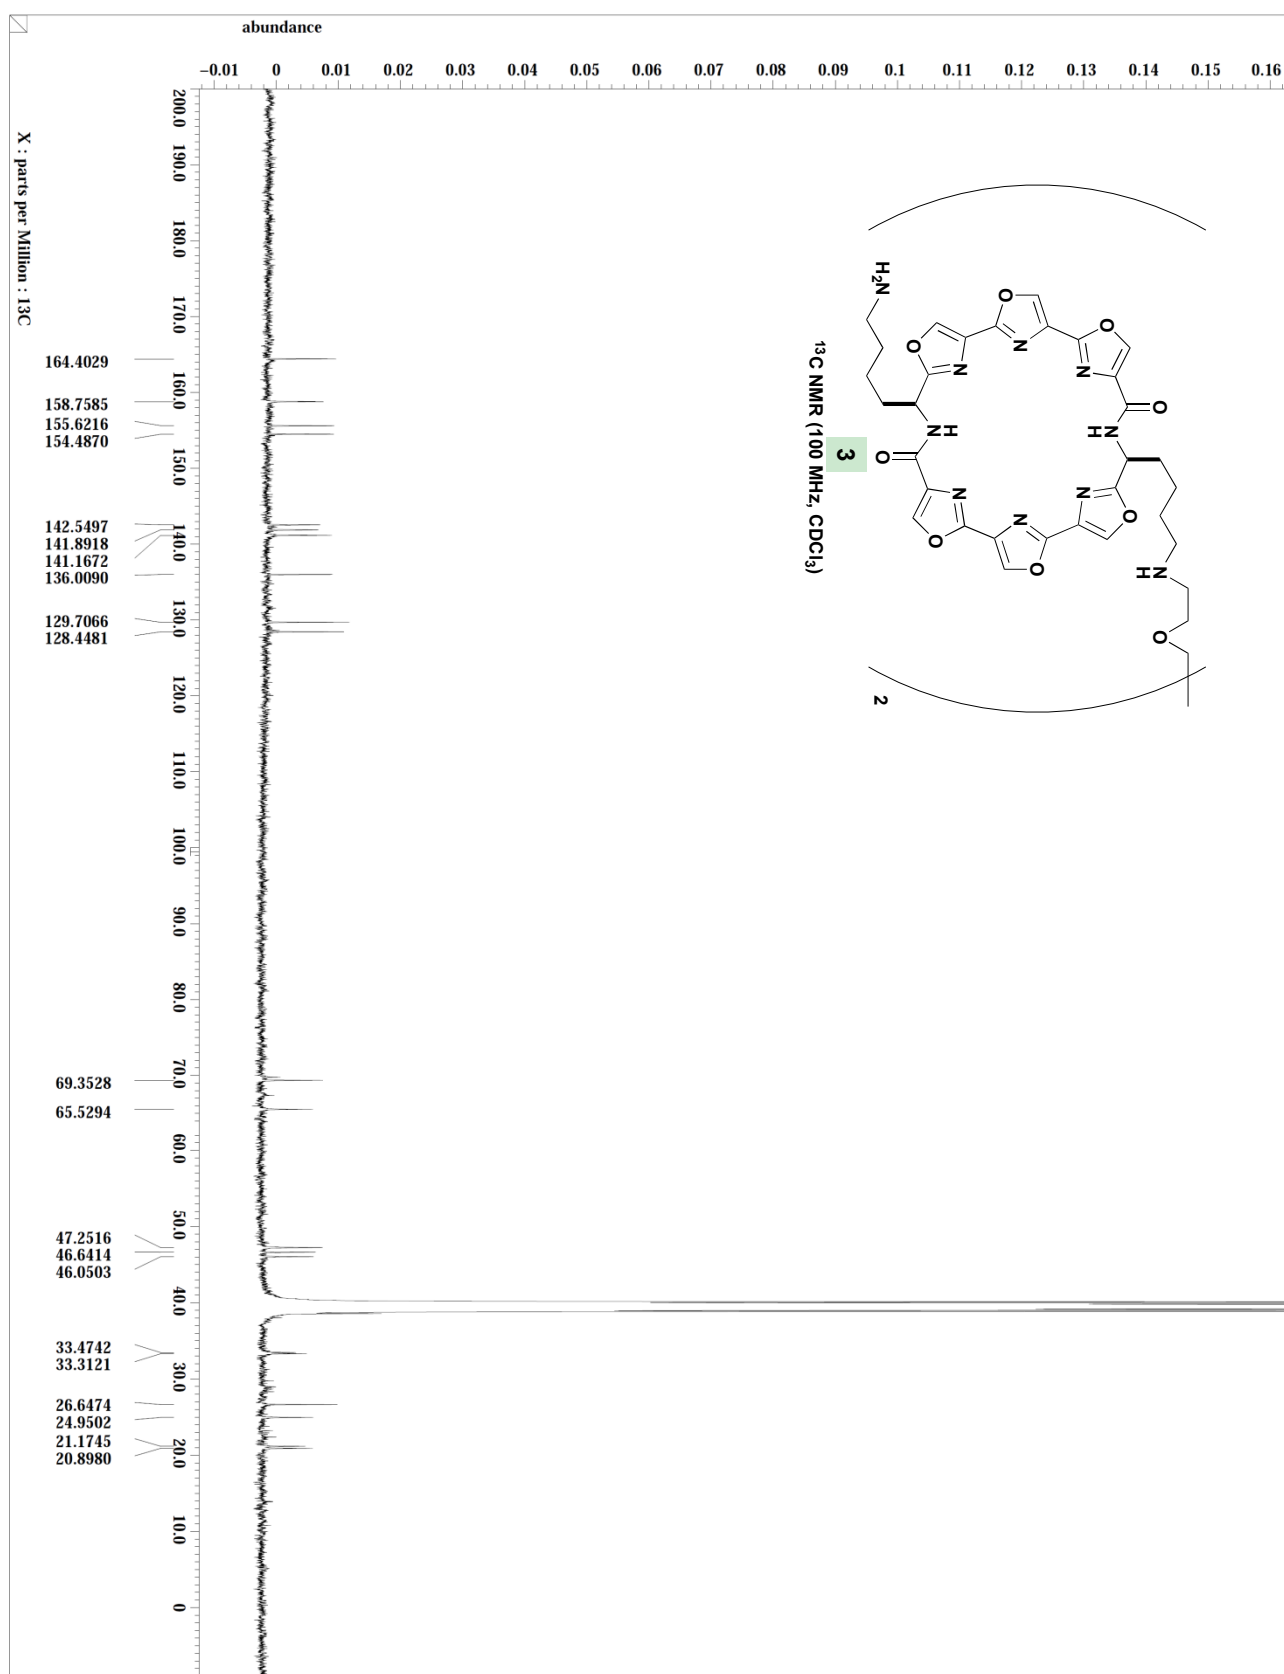



## ESI-MS Spectrometry

All measurements were carried out on a JMS-T100LC AccuTOF (JEOL), using the electrospray ionization (ESI) source in negative mode, as described previously. The measurement conditions and the sample preparation procedures were as follows: capillary needle voltage,  $-2.0$  kV; ring lens voltage,  $-15$  V; orifice 1 voltage,  $-75$  V; orifice 2 voltage,  $0$  V; orifice 1 temperature,  $80$  °C; desolvation temperature,  $80$  °C; sample flow rate,  $5$  mL  $\text{min}^{-1}$ ; All experiments were performed in  $20$  mM  $\text{NH}_4\text{OAc}$  containing  $10$   $\mu\text{M}$  of GFOs and  $40$   $\mu\text{M}$  of **7**. Methanol (10%) was added just before injection. The role of methanol is to increase ion signals.

**Figure S2.** ESI mass spectra of  $10$   $\mu\text{M}$  telo24 with  $40$   $\mu\text{M}$  dimer **3**.

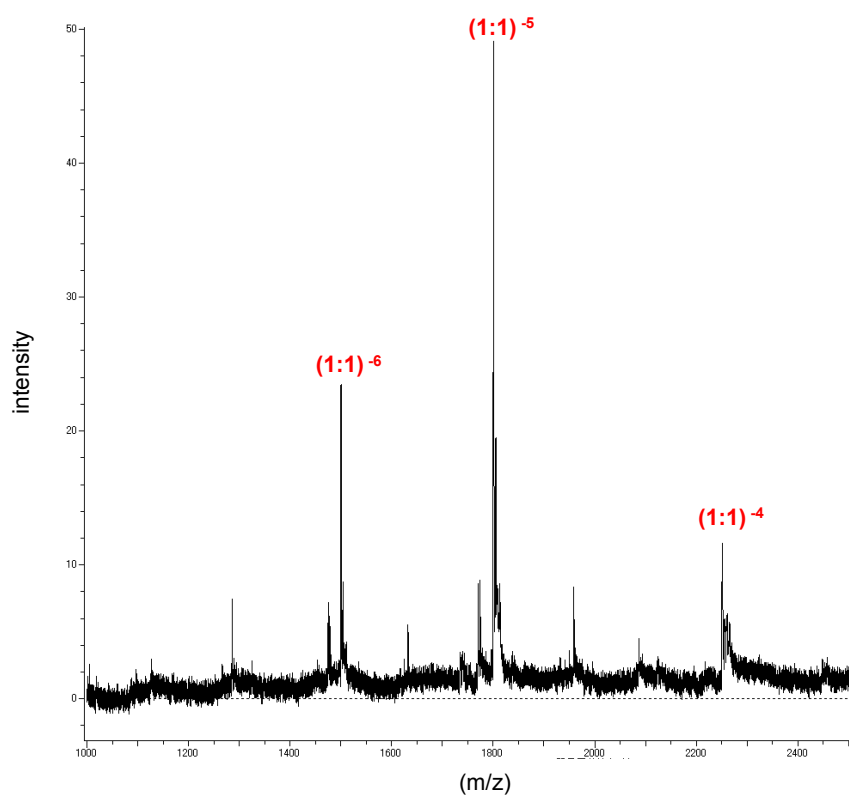

|                                     |                  |
|-------------------------------------|------------------|
| Telomeric DNA (TTAGGG) <sub>4</sub> | 10 $\mu\text{M}$ |
| Dimer ( <b>7</b> )                  | 40 $\mu\text{M}$ |
| $\text{NH}_4\text{OAc}$             | 20 mM            |

$(\text{one DNA} + \text{one dimer-4H}^+)^{-4} = \text{calct. } 2250.44, \text{ found } 2251.12$   
 $(\text{one DNA} + \text{one dimer-5H}^+)^{-5} = \text{calct. } 1799.95, \text{ found } 1800.76$   
 $(\text{one DNA} + \text{one dimer-6H}^+)^{-6} = \text{calct. } 1499.79, \text{ found } 1500.47$

**Figure S3.** Normalized thermal melting and annealing profiles recorded at 295 nm of (TTAGGG) $_n$  ( $n = 4-16$ ) in the presence of 100 mM KCl with **2**.

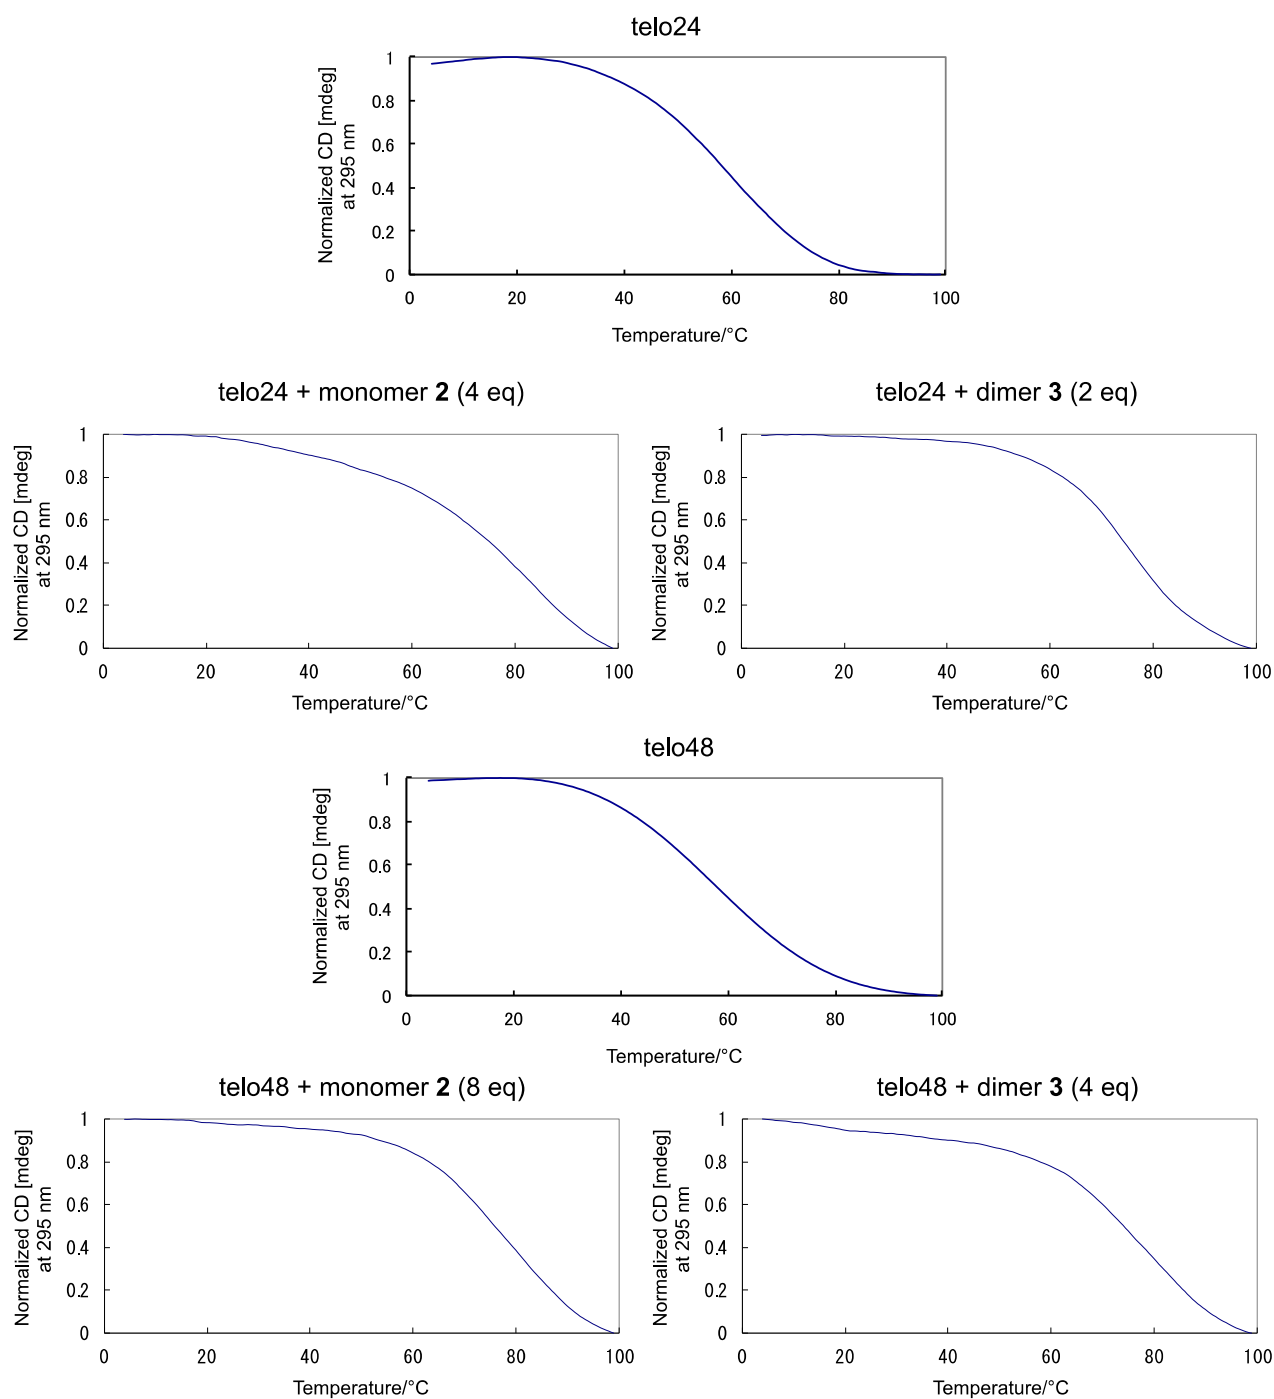

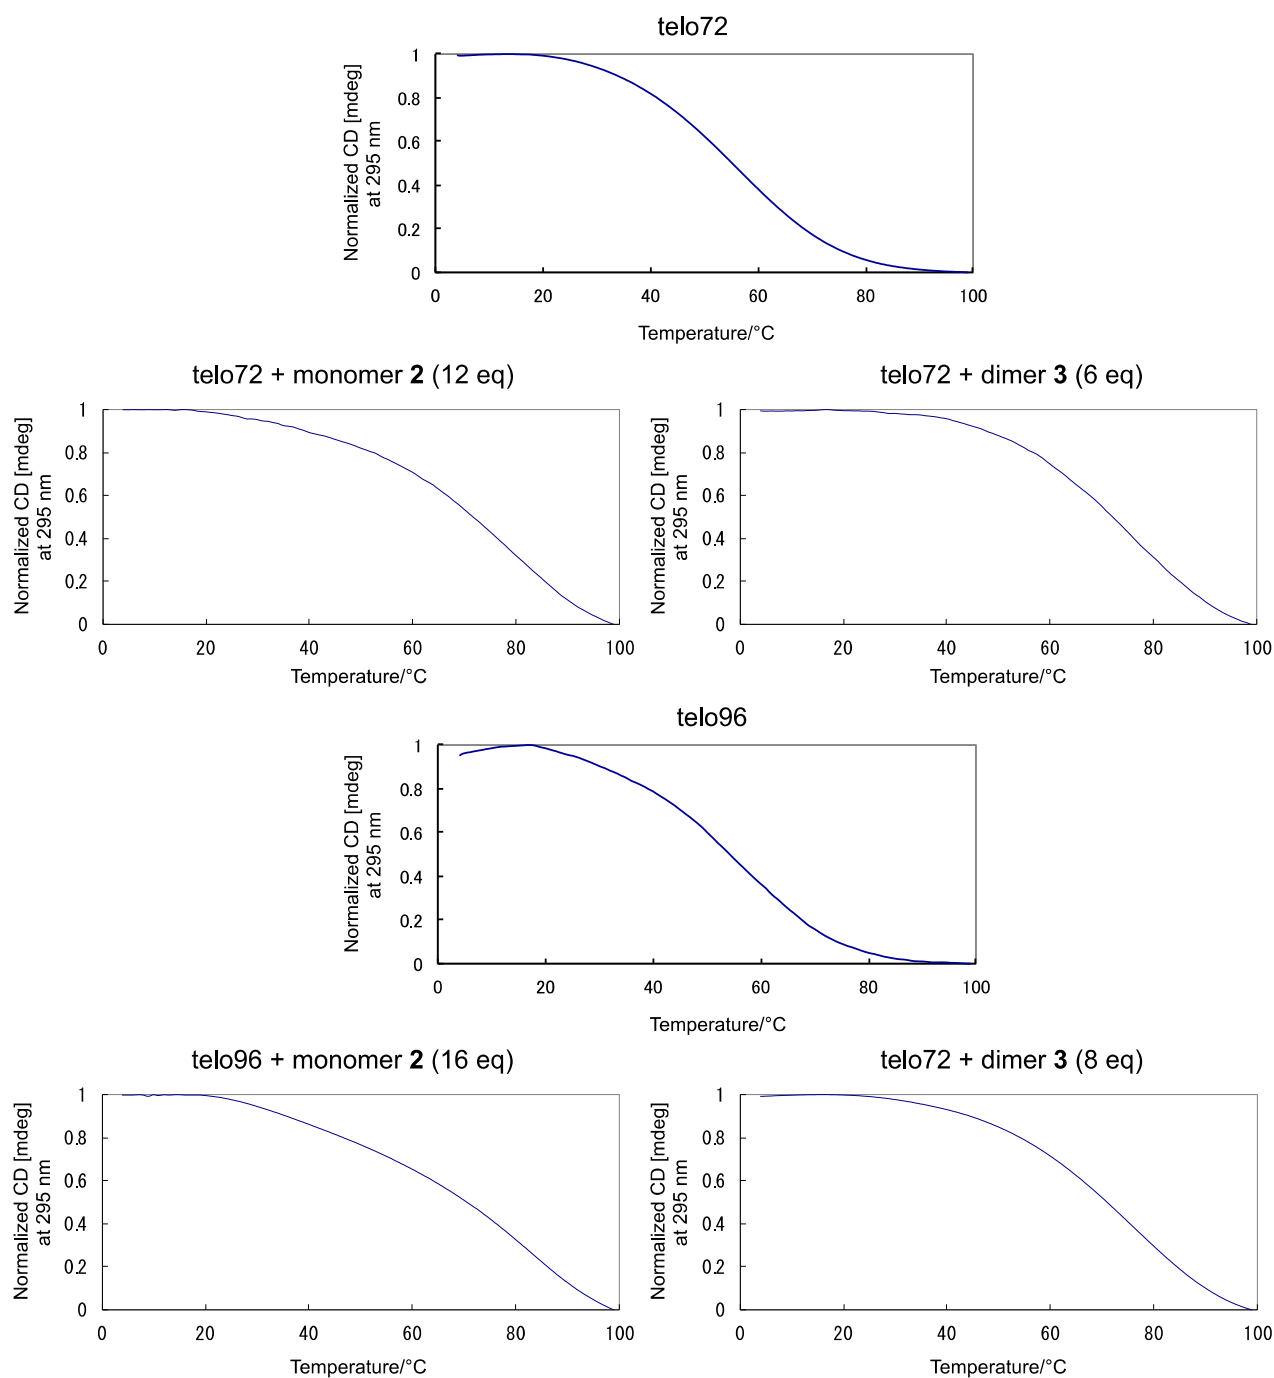

**Telomerase Repeat Amplification Protocol (TRAP) Assay****Figure S4.** Telomerase inhibitory activity of dimer **3** using TRAP assay.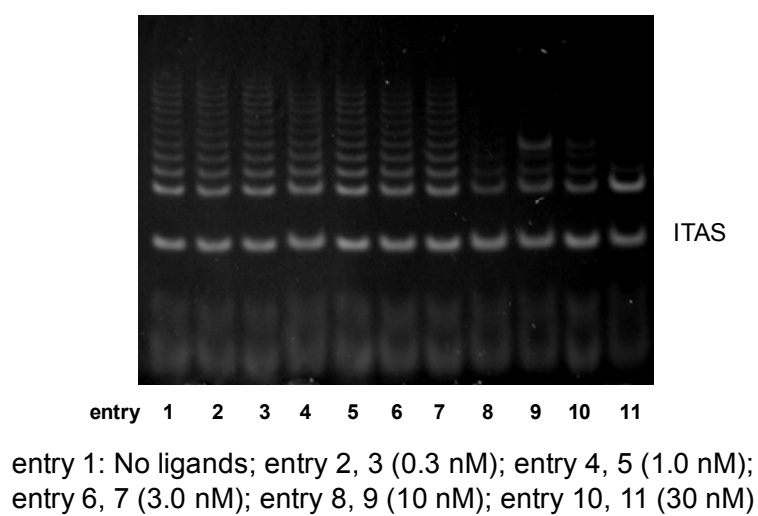

Supplement: s1 [file s1]
